# Supplementary material for: Effect of a 2-day communication skills training on nursing and midwifery students’ empathy: a randomised controlled trial
Source: PubMed Central journal article supplement — BMJ Open. 2019 Mar 1;9(3):e023666. doi: 10.1136/bmjopen-2018-023666 (PMC6429730; doi:10.1136/bmjopen-2018-023666), 2019-03-01
Supplement: bmjopen-2018-023666supp001.pdf [file bmjopen-2018-023666supp001.pdf]

**Additional file 1: Table 1; Principal component analysis****Component Loadings**

|             | <b>RC 1</b> | <b>RC 2</b> | <b>Uniqueness</b> |
|-------------|-------------|-------------|-------------------|
| JSE_T1_Qn1  | .           | 0.553       | 0.701             |
| JSE_T1_Qn10 | 0.485       | .           | 0.735             |
| JSE_T1_Qn11 | .           | 0.552       | 0.638             |
| JSE_T1_Qn12 | .           | 0.622       | 0.605             |
| JSE_T1_Qn13 | 0.477       | .           | 0.767             |
| JSE_T1_Qn14 | .           | .           | 0.842             |
| JSE_T1_Qn15 | 0.591       | .           | 0.657             |
| JSE_T1_Qn16 | 0.676       | .           | 0.526             |
| JSE_T1_Qn17 | .           | .           | 0.886             |
| JSE_T1_Qn18 | -0.551      | .           | 0.703             |
| JSE_T1_Qn19 | .           | .           | 0.927             |
| JSE_T1_Qn2  | 0.446       | .           | 0.798             |
| JSE_T1_Qn20 | 0.689       | .           | 0.535             |
| JSE_T1_Qn3  | .           | .           | 0.848             |
| JSE_T1_Qn4  | 0.551       | .           | 0.596             |
| JSE_T1_Qn5  | 0.535       | .           | 0.713             |
| JSE_T1_Qn6  | .           | 0.432       | 0.766             |
| JSE_T1_Qn7  | .           | .           | 0.825             |
| JSE_T1_Qn8  | .           | 0.499       | 0.756             |
| JSE_T1_Qn9  | .           | .           | 0.725             |

**Additional file 1: Table 2; Chi-squared test**

|       | <b>Value</b> | <b>df</b> | <b>p</b> |
|-------|--------------|-----------|----------|
| Model | 213.474      | 151       | < .001   |

**Additional file 1: Table 3; Independent Samples T-test**

|        | <b>t</b> | <b>df</b> | <b>p</b> | <b>Cohen's d</b> | <b>95% CI for Cohen's d</b> |              |
|--------|----------|-----------|----------|------------------|-----------------------------|--------------|
|        |          |           |          |                  | <b>Lower</b>                | <b>Upper</b> |
| Time 1 | 1.051    | 172.0     | 0.295    | 0.160            | -0.139                      | 0.458        |
| Time 2 | 1.323    | 172.0     | 0.187    | 0.201            | -0.098                      | 0.499        |
| Time 3 | -1.658   | 172.0     | 0.099    | -0.252           | -0.551                      | 0.048        |

*Note.* Student's t-test.
