# Supplementary figures and images for: Effect of a 2-day communication skills training on nursing and midwifery students’ empathy: a randomised controlled trial
Source: PubMed Central journal article supplement — BMJ Open. 2019 Mar 1;9(3):e023666. doi: 10.1136/bmjopen-2018-023666 (PMC6429730; doi:10.1136/bmjopen-2018-023666), 2019-03-01

Additional file 2: Fig. 1; Scree plot

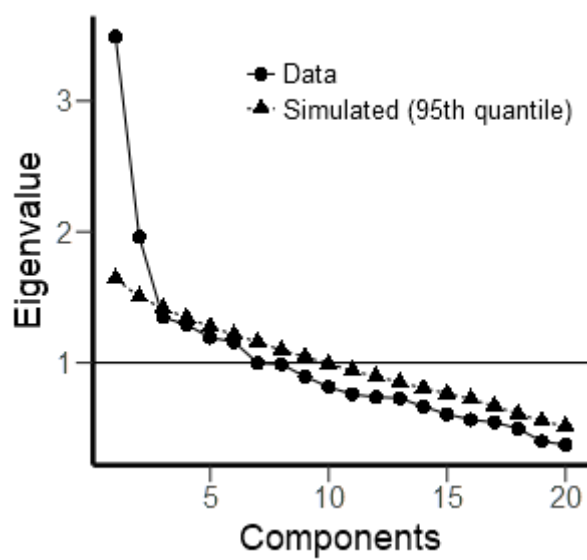

Supplement: bmjopen-2018-023666supp002.pdf [file bmjopen-2018-023666supp002.pdf]
